# Supplementary material for: Addition of the Aβ42/40 ratio to the cerebrospinal fluid biomarker profile increases the predictive value for underlying Alzheimer’s disease dementia in mild cognitive impairment
Source: PubMed Central journal article supplement (PMC5861634; doi:10.1186/s13195-018-0362-2), 2018-03-20
Supplement: 13195_2018_362_MOESM1_ESM.pdf [file 13195_2018_362_MOESM1_ESM.pdf]

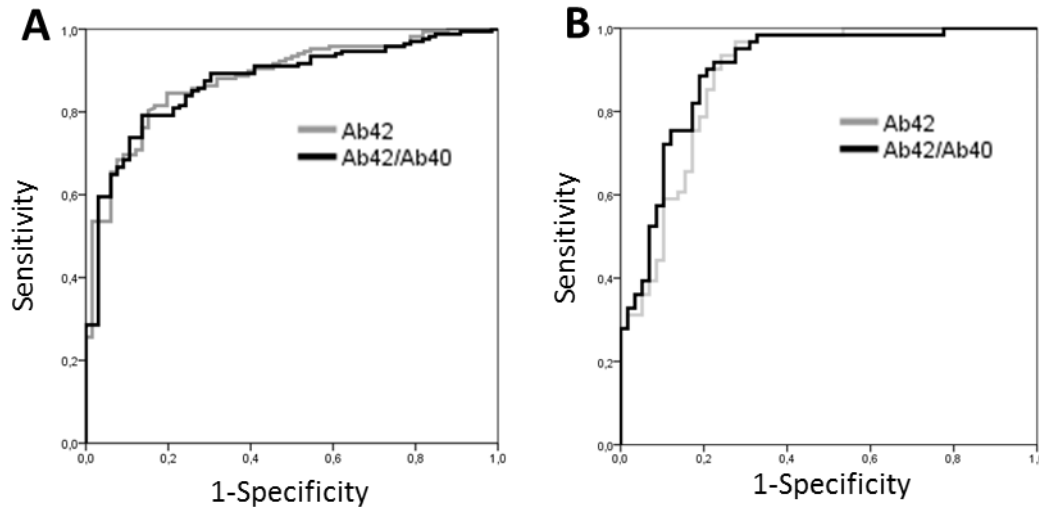

**Figure S1:** Receiver operating characteristics (ROC) curves for (A) distinguishing between AD-dementia patients and controls and for (B) the predicted probabilities of conversion to AD in MCI patients derived from logistic regression models, using either CSF A $\beta$ 42 or the A $\beta$ 42/40 ratio.
